# Supplementary material for: iTRAQ-Based Proteomics Analysis of Serum Proteins in Wistar Rats Treated with Sodium Fluoride: Insight into the Potential Mechanism and Candidate Biomarkers of Fluorosis
Source: Int J Mol Sci. 2016 Sep 28;17(10):1644. doi: 10.3390/ijms17101644 (PMC5085677; doi:10.3390/ijms17101644)
Supplement: Supplementary file 1 [file ijms-17-01644-s001.xlsx]

## Sheet: Table S1 
Table S1. List of identified proteins using the iTRAQ-based quantitative proteomics approach.
No.	Unused	Protein Name	Accession #	Gene Name	Protein Score	% Cov	Peptides (95%)	50mg/L NaF vs. Control				150mg/L NaF vs. Control				250mg/L NaF vs. Control
								Ratio (114:113)	PVal 114:113	Ratio (118:117)	PVal 118:117	Ratio (115:113)	PVal 115:113	Ratio (119:117)	PVal 119:117	Ratio (116:113)	PVal 116:113	Ratio (121:117)	PVal 121:117
1	168.15	Complement C3	M0RBF1	C3	168.15	74.2	117	1.1135	0.0001	0.9901	0.7444	0.7655	0	0.9	0.0193	0.9953	0.8988	0.9267	0.0337
2	149.47	Apolipoprotein B-100	Q7TMA5	Apob	149.47	31.2	76	1.0107	0.7066	1.0147	0.5949	1.0391	0.3816	1.1064	0.0094	0.9993	0.9831	1.0123	0.6961
3	135.27	α-1-inhibitor 3	P14046	A1i3	135.27	73.3	107	0.8569	0.0811	0.7488	0.003	0.9605	0.7497	1.25	0.0286	1.616	0	1.4242	0.0004
4	121.82	α-1-macroglobulin	Q63041	A1m	124.48	70.9	103	0.9775	0.5296	0.8155	0.0002	0.6958	0	0.9612	0.4365	1.0946	0.0682	0.9843	0.8064
5	111.5	Fibronectin	P04937	Fn1	111.5	50.2	64	1.1206	0	1.0496	0.0977	1.0617	0.2516	1.0528	0.1689	1.1793	0	1.0795	0.0174
6	95.91	Complement C4	P08649	C4	95.91	46.8	55	1.1385	0.012	1.2431	0.0001	0.9614	0.7675	0.9771	0.7823	1.0477	0.3385	1.0395	0.74
7	90.57	Serum albumin	P02770	Alb	90.73	89.1	72	1.072	0.0244	0.8706	0.0002	0.7614	0.0113	0.9513	0.5617	1.2727	0.0001	1.1313	0.0075
8	84.04	Ceruloplasmin	G3V7K3	Cp	84.04	63.3	57	1.1446	0.0008	0.9944	0.8646	0.5852	0	0.7127	0	0.8793	0.0043	0.7742	0
9	83.47	Serotransferrin	P12346	Tf	83.47	86.4	70	0.9294	0.0404	0.7805	0	0.6468	0.0043	0.8437	0.2565	1.0561	0.4554	0.9362	0.5176
10	77.34	Protein Cfh	G3V9R2	Cfh	77.34	52.5	46	1.0365	0.2424	0.9717	0.4461	0.8875	0.0291	0.9478	0.1789	1.0306	0.4745	0.953	0.5686
11	72.55	Inter α-trypsin inhibitor, heavy chain 4	Q5EBC0	Itih4	72.55	60.1	46	1.0576	0.1257	0.948	0.2699	0.6854	0.0001	0.8075	0.006	0.9882	0.7539	0.9022	0.055
12	67.4	α-2-macroglobulin	P06238	A2m	73.28	43.7	43	3.1136	0	2.8974	0	0.8625	0.06	0.9311	0.2292	0.7343	0	0.7257	0
13	59.64	Da1-24	Q7TP05	Cfb	59.84	47.1	37	-	-	-	-	-	-	-	-	-	-	-	-
14	57.31	Plasminogen	Q01177	Plg	57.31	67.1	44	0.9213	0.0178	0.8833	0.0047	0.7978	0.0007	0.9085	0.0769	1.0544	0.1237	1.0583	0.2332
15	52.31	Hemopexin	P20059	Hpx	52.31	68.7	37	1.1371	0.044	1.0501	0.2515	0.5325	0.0001	0.6635	0.0004	0.7542	0.0001	0.6868	0.0031
16	50.15	Group specific component	Q68FY4	GC	50.15	72.7	41	0.9529	0.1705	0.8714	0.0058	0.845	0.0402	0.9629	0.4279	1.1404	0.051	1.053	0.3222
17	47.05	Murinoglobulin-1	Q03626	Mug1	125.05	67.2	94	0.9142	0.3578	0.834	0.0408	0.8163	0.1986	1.0721	0.4109	1.2703	0.0305	1.1864	0.0439
18	46.78	Apolipoprotein A-IV	P02651	Apoa4	46.83	83.9	40	1.032	0.4965	0.9513	0.2211	0.8566	0.4723	1.0091	0.8406	1.32	0	1.2496	0.0006
19	46.73	Coagulation factor II, isoform CRA_a	G3V843	F2	46.73	54.3	29	0.9926	0.8458	0.902	0.0114	0.7954	0.0017	0.8611	0.0028	1.0146	0.8615	0.9221	0.1787
20	45.83	T-kininogen 2	P08932		45.83	65.4	34	2.013	0.0005	1.8833	0.0009	0.5213	0.0033	0.6055	0.0038	0.6734	0.001	0.681	0.0205
21	45.78	Afamin	P36953	Afm	45.78	58.9	31	0.943	0.0949	0.8922	0.0027	1.046	0.621	1.1239	0.0133	1.2056	0.0004	1.1546	0.0246
22	42.06	Protein LOC299282	F1LM05	LOC299282	42.06	47.9	31	-	-	-	-	-	-	-	-	-	-	-	-
23	41	C9 protein	Q5BKC4	C9	41	55.2	29	1.3728	0	1.3018	0	0.7441	0.0028	0.8095	0.0021	0.8592	0.0052	0.7736	0.0035
24	40.96	α-1-antiproteinase	P17475	Serpina1	40.96	61.3	33	0.913	0.0473	0.7924	0.0005	0.6412	0.003	0.8214	0.0358	0.8009	0.0082	0.7528	0.0002
25	37.36	Inter-α trypsin inhibitor, heavy chain 1 (Predicted), isoform CRA_a	B2RYM3	Itih1	37.36	42.6	28	0.8721	0.0863	0.8561	0.1013	0.936	0.5101	1.0162	0.8416	1.0678	0.4973	1.0357	0.5188
26	36.84	α-1B-glycoprotein	Q9EPH1	A1bg	36.84	52.2	27	0.8766	0.0464	0.7435	0.0017	0.5819	0.0001	0.7324	0.0001	1.3089	0.0004	1.1792	0.0011
27	36	Carboxylesterase 1C	P10959	Ces1c	36	40.3	26	0.9534	-	0.8838	-	1.1167	-	1.0503	-	0.9835	-	0.7868	-
28	35.49	Uncharacterized protein	F1LN61		35.54	71.1	41	0.7751	0.0009	0.6114	0.0001	0.503	0.0421	0.7052	0.0033	0.8473	0.0858	0.7644	0.0018
29	35.26	Protein Serpinc1	Q5M7T5	Serpinc1	35.26	52.7	23	0.9882	0.7595	0.8855	0.0048	0.7684	0.0004	0.9142	0.0841	0.9804	0.7622	0.898	0.1938
30	35.09	Inter-α-trypsin inhibitor heavy chain H3	Q63416	Itih3	35.11	47	28	1.0487	0.2999	0.951	0.5344	0.7413	0.028	0.8549	0.1117	1.1553	0.1042	1.1179	0.0778
31	34.78	Protein Itih2	D3ZFH5	Itih2	34.78	40.5	21	0.978	0.7074	0.9469	0.4983	0.8588	0.1377	0.9527	0.6746	1.0597	0.4782	1.0241	0.7719
32	34.49	Apolipoprotein A-I	P04639	Apoa1	34.49	69.1	28	0.915	0.0297	0.8002	0.0005	0.7345	0.0002	0.9309	0.11	1.2454	0.0069	1.1535	0.0324
33	33.22	Fetub protein OS	Q6IRS6	Fetub	33.23	66.7	22	0.9903	0.8375	0.8774	0.0864	0.7814	0.0066	1.065	0.4591	1.408	0	1.2796	0.0089
34	32.78	Leukemia inhibitory factor receptor	G3V7K2	Lifr	32.78	35.2	18	0.9416	0.1709	0.9472	0.2078	0.8512	0.0666	0.8893	0.1358	1.0921	0.1397	1.0379	0.387
35	32.67	Haptoglobin	P06866	Hp	32.67	63.7	24	1.3521	0	1.1735	0.0097	0.3764	0	0.504	0	0.5563	0	0.5462	0
36	31.07	Complement component 8, α polypeptide (Predicted)	D3ZWD6	C8a	31.07	50.8	19	0.9888	0.8094	1.0427	0.711	0.8923	0.1155	0.9213	0.2222	0.8983	0.0654	0.9848	0.8451
37	30.76	Serine protease inhibitor A3K	P05545	Serpina3k	41.3	62.5	30	0.9035	0.2137	0.776	0.0442	0.8136	0.0903	0.965	0.7643	1.6135	0.0006	1.4523	0.0104
38	29.27	Serine protease inhibitor A3N	P09006	Serpina3n	37.61	62.4	26	1.4622	0	1.284	0.0002	0.6048	0.0042	0.7417	0.0028	0.9619	0.5934	0.8329	0.1084
39	27.46	Apolipoprotein E	P02650	Apoe	27.46	69.9	25	1.0091	0.8571	0.9685	0.5248	0.8348	0.0796	0.9449	0.3471	1.1045	0.1235	1.1288	0.0396
40	27.38	Protein Thbs1 (Fragment)	M0R979	Thbs1	27.39	38.9	17	1.0052	0.9248	0.9487	0.4132	1.0349	0.8314	1.0521	0.6355	1.1424	0.116	1.116	0.2853
41	26	Complement component C8 β chain	P55314	C8b	26	35.8	15	1.0107	0.8361	1.0876	0.5462	0.9222	0.3194	1.0067	0.9422	0.9083	0.0879	1.0594	0.6206
42	25.71	Uncharacterized protein (Fragment)	F1LM30	-	25.71	50	20	0.7184	0.0001	0.6215	0.0013	0.4156	0	0.5293	0.0018	0.507	0	0.4829	0.0004
43	25.55	Protein RGD1310507	E9PST1	RGD1310507	26.23	41.8	17	0.993	0.9878	0.9947	0.9136	0.9187	0.6942	0.9686	0.6078	1.1192	0.6362	1.0838	0.5434
44	24.9	Gelsolin	Q68FP1	Gsn	24.9	43	14	0.9199	0.0676	0.8544	0.0088	0.833	0.0293	1.0076	0.8726	1.0744	0.2967	0.9515	0.5941
45	24.01	Corticosteroid-binding globulin	P31211	Serpina6	24.01	42.4	19	0.8563	0.0134	0.7373	0.0033	0.8127	0.0425	0.9442	0.6471	0.8367	0.0154	0.7587	0.002
46	23.71	Oxidation resistance protein 1 (Fragment)	F1M7F8	C7	23.71	36.8	14	0.994	0.9376	1.0614	0.338	0.9198	0.4288	0.9768	0.7399	0.9982	0.9719	0.9206	0.2738
47	23.51	Kininogen-1	P08934	Kng1	30.41	43.2	20	1.1307	0.02	0.9914	0.8655	0.9373	0.4258	1.1366	0.1321	1.3161	0.0005	1.2145	0.0144
48	23.49	Protein Cpn2	F1LQT4	Cpn2	23.51	35.2	15	0.9871	0.8567	1.1544	0.1159	1.0243	0.8263	1.0526	0.647	1.1105	0.0647	1.0718	0.5683
49	23.31	Histidine-rich glycoprotein	Q99PS8	Hrg	23.31	45.1	13	1.0329	0.5745	1.0138	0.7789	0.9953	0.9404	1.106	0.1499	1.1039	0.2335	1.0661	0.783
50	23	Complement factor I	Q9WUW3	Cfi	23	45.4	18	0.9896	0.8505	0.9003	0.3915	0.8837	0.321	1.0586	0.4963	1.0557	0.5014	1.0398	0.6769
51	22.26	Protein F13b	F6Q1N1	F13b	22.26	36.6	11	1.0106	0.8938	0.9279	0.1797	1.0938	0.5586	0.9806	0.7917	1.0563	0.291	1.0351	0.7437
52	21.73	Plasma protease C1 inhibitor	Q6P734	Serping1	21.73	39.3	14	1.3204	0.0001	1.2429	0.0045	0.939	0.4434	0.945	0.4267	1.0545	0.3834	0.9673	0.4729
53	21.56	Angiotensinogen	P01015	Agt	21.56	36.7	11	0.9294	0.1824	0.97	0.5637	0.9277	0.5371	0.9736	0.6752	1.0847	0.3206	1.1101	0.0668
54	20.45	Kallikrein B, plasma 1	Q5FVS2	Klkb1	20.45	36.7	11	1.0567	0.4564	0.9954	0.9562	1.0522	0.701	0.9992	0.9916	1.0898	0.3145	1.0771	0.3485
55	20	Clusterin	G3V836	Clu	20	40	13	0.9222	0.1374	0.8788	0.0291	0.8248	0.1409	0.9363	0.5597	0.9655	0.4973	0.9793	0.6852
56	20	CD5 antigen-like	Q4KM75	Cd5l	20	42.8	10	0.9651	0.5322	0.8956	0.0772	0.7776	0.002	0.8876	0.0628	0.7161	0.0008	0.7032	0.0027
57	20	Keratin, type I cytoskeletal 10	Q6IFW6	Krt10	20	25.9	13	2.369	0.0001	2.4643	0	1.1423	0.1416	1.1681	0.1285	1.0406	0.5074	1.2994	0.0428
58	20	Carboxypeptidase Q	Q6IRK9	Cpq	20	40.5	10	0.9503	0.5369	1.0906	0.1898	1.0349	0.7422	1.0671	0.5133	1.0961	0.2146	1.0898	0.2145
59	20	Serum paraoxonase/arylesterase 1	P55159	Pon1	20	51.3	13	0.8332	0.1573	0.8345	0.0907	0.7738	0.1586	0.8709	0.3305	1.0582	0.629	1.0666	0.336
60	19.73	Glycosylphosphatidylinositol specific phospholipase D1, isoform CRA_a	G3V8B1	Gpld1	19.73	26.7	10	0.9492	0.4306	0.9383	0.5049	1.0323	0.7745	0.9978	0.9751	1.1527	0.1311	1.0559	0.5876
61	19.45	Protein Serpinf2	Q68FT8	Serpinf2	19.48	35.9	12	1.0111	0.8263	0.9041	0.1296	0.7685	0.015	0.9516	0.3985	1.0463	0.6528	1.0349	0.7097
62	18.87	Actin, cytoplasmic 2	P63259	Actg1	18.87	52.8	11	1.0208	0.7016	0.828	0.0417	2.5397	0.0161	2.6634	0.0161	0.9073	0.1981	0.7732	0.1393
63	18.71	C4b-binding protein α chain	Q5M891	C4bpa	18.71	28.3	10	1.2853	0.0005	1.1782	0.0074	0.918	0.4419	0.886	0.2523	0.8315	0.0129	0.7774	0.0005
64	18.67	Uncharacterized protein (Fragment)	F1LPQ6	-	18.67	63.4	17	0.7786	0.0056	0.7159	0.0057	0.3936	0.0077	0.5873	0.0285	0.8797	0.2388	0.8033	0.0101
65	18.52	Carboxypeptidase N catalytic chain	Q9EQV8	Cpn1	18.57	38.3	10	0.9878	0.8268	1.0307	0.6101	1.0248	0.6675	1.1604	0.0516	1.1534	0.0804	1.0751	0.3872
66	18.34	Apolipoprotein H	Q5I0M1	Apoh	18.34	51.9	11	0.8911	0.0876	0.8506	0.0262	0.9383	0.5485	1.0519	0.5351	1.1473	0.044	1.0389	0.5024
67	18.21	α-2-HS-glycoprotein	P24090	Ahsg	18.21	67.9	14	0.8715	0.1211	0.7555	0.0117	0.8344	0.2273	1.0617	0.5963	1.3013	0.0642	1.185	0.1885
68	18.16	Protein F5	F1LNI3	F5	18.16	14.4	9	1.1504	0.1132	1.1475	0.4289	1.2767	0.0922	1.2724	0.061	1.0836	0.3704	1.1613	0.1732
69	18.13	Protein Vtn	Q3KR94	Vtn	18.13	39.3	10	1.0275	0.6382	0.9931	0.9291	0.8479	0.2065	0.9483	0.6033	1.1627	0.0529	1.1597	0.0724
70	18.03	Serine protease inhibitor A3M (Fragment)	F1LR92	Serpina3m	26.07	44.3	14	1.0331	0.6471	1.18	0.1141	1.0692	0.5003	1.0445	0.5678	1.4612	0.0002	1.4379	0.0181
71	18.01	Protein AMBP	Q64240	Ambp	18.01	48.7	14	0.9737	0.8635	0.9222	0.2755	0.8331	0.3652	0.9148	0.371	1.1214	0.1852	1.056	0.6704
72	17.54	Coagulation factor IX	F1M1M6	F9	17.54	40.7	9	1.113	0.0677	1.1274	0.1624	1.0145	0.8277	1.0972	0.1055	0.9995	0.993	1.1654	0.0364
73	17.43	Lumican	P51886	Lum	17.43	49.4	10	1.0773	0.345	1.0537	0.3237	1.1151	0.6091	1.0915	0.1825	1.0046	0.9526	0.9946	0.9168
74	17.36	Heparin cofactor 2	Q64268	Serpind1	17.36	29.7	10	0.9551	0.4371	0.9063	0.1223	0.8356	0.0332	0.9564	0.5336	0.979	0.7161	0.9851	0.8528
75	16.1	Ig kappa chain C region, B allele	P01835	-	16.1	95.3	15	0.7206	0.0021	0.5823	0.0013	0.5674	0.0068	0.6859	0.0144	0.9156	0.344	0.8107	0.0329
76	16.01	Insulin-like growth factor-binding protein complex acid labile subunit (Fragment)	F1LRE2	Igfals	16.01	33.7	8	0.855	0.5513	0.973	0.7514	1.0381	0.7771	1.0191	0.9402	1.0927	0.4749	0.9572	0.8159
77	16	Coagulation factor X	Q63207	F10	16	28.4	9	0.9586	0.5366	0.9821	0.8233	0.8991	0.3592	1.0284	0.7248	1.0196	0.797	1.0033	0.9602
78	16	Hemoglobin subunit β-1	P02091	Hbb	16	70.8	12	0.7868	0.2712	0.7155	0.2694	0.7519	0.2334	0.8372	0.3554	1.2174	0.3233	1.1444	0.4434
79	15.54	Uncharacterized protein	F1LP69	LOC297568	74.7	46.8	55	1.0075	0.8927	0.9272	0.3982	1.0929	0.4952	1.0094	0.9167	1.1707	0.0167	1.0733	0.4496
80	15.46	Complement component 4, gene 2	Q6MG90	C4b	79.83	40	46	1.4218	0.026	1.4743	0.0142	1.324	0.0681	1.0455	0.7682	1.3556	0.0057	1.095	0.5112
81	14.76	α-2 antiplasmin	Q80ZA3	Serpinf1	14.76	33.3	8	0.8892	0.1239	0.9589	0.6006	1.0165	0.8422	0.9462	0.667	1.008	0.9169	0.9843	0.8763
82	14.7	Coagulation factor XII	D3ZTE0	F12	14.7	26.2	9	0.9485	0.4	1.0295	0.6217	0.8789	0.3688	0.9855	0.815	1.0521	0.4435	1.0046	0.9687
83	14	Protein Vnn3	D4A183	Vnn3	14	30.4	7	0.9099	0.2543	0.9437	0.6927	0.9363	0.7646	1.1309	0.5311	1.1004	0.29	1.0734	0.4837
84	13.95	α-2-glycoprotein 1, zinc	Q3B8R6	Azgp1	13.95	44.6	8	1.0214	0.7222	0.968	0.6069	0.8262	0.0131	1.0185	0.7633	1.1953	0.0179	1.0961	0.395
85	13.78	Protein Serpina4	Q5M8C3	Serpina4	13.79	37.6	8	0.8727	0.0197	0.8577	0.0948	1.0497	0.5043	1.215	0.0104	1.0245	0.7824	1.046	0.4143
86	13.77	Fibrinogen β chain	P14480	Fgb	13.78	42.2	7	1.0998	0.1713	1.194	0.0383	1.0855	0.5466	0.9855	0.8906	1.0005	0.9935	0.912	0.4484
87	13.51	Protein Tln1	G3V852	Tln1	13.54	20.8	7	1.0285	0.7672	1.3388	0.0999	1.1934	0.2106	1.0212	0.8564	0.9045	0.4669	1.0034	0.9664
88	13.44	Complement component 2	Q6MG73	C2	26.28	40.6	15	1.1004	0.3685	1.0982	0.4782	1.062	0.5052	1.0546	0.4201	1.0414	0.6835	0.9405	0.6134
89	13.18	Complement component C6	Q811M5	C6	13.18	27.3	7	0.9762	0.8411	0.9128	0.5852	0.8897	0.1577	0.7847	0.1184	0.7995	0.0803	0.7698	0.1239
90	13.15	Glutathione peroxidase 3	P23764	Gpx3	13.15	45.6	14	1.003	0.9667	0.8954	0.081	0.9926	0.9486	1.0367	0.5321	1.1361	0.0874	0.9972	0.9741
91	12.51	Fibrinogen-like 2	G3V7P2	Fgl2	12.51	30.1	8	1.0252	0.7559	0.9516	0.4804	0.9537	0.7395	1.0973	0.4202	0.9948	0.9391	1.0056	0.9352
92	12.29	Epidermal growth factor receptor, isoform CRA_b	G3V6K6	Egfr	12.31	16.5	6	0.9157	0.3482	1.0507	0.5996	0.9996	0.9956	1.0186	0.8236	1.1294	0.2242	1.1327	0.1892
93	12.23	Protein Z-dependent protease inhibitor	Q62975	Serpina10	12.23	31.4	8	0.9611	0.4831	1.0317	0.5763	0.8805	0.0441	1.0007	0.9932	0.9591	0.4848	0.9559	0.4273
94	12.17	Murinoglobulin-2	Q6IE52	Mug2	95.07	58.8	68	1.0306	0.8322	1.0456	0.8473	1.1249	0.6153	1.1464	0.2715	1.0547	0.553	1.1823	0.2983
95	12.04	Glycoprotein 5, platelet	G3V9H9	Gp5	12.04	35.1	6	0.9234	0.7296	1.2664	0.3015	1.1017	0.4846	1.1321	0.6126	1.1377	0.3356	1.0237	0.938
96	12.01	Interleukin 1 receptor accessory protein	F1M9B9	Il1rap	12.01	27.7	7	0.9369	0.4349	0.9275	0.5582	1.2413	0.2108	1.0412	0.5005	0.8611	0.0371	0.8724	0.0604
97	12	Extracellular matrix protein 1	Q62894	Ecm1	12	33.6	6	1.0312	0.663	1.3518	0.0999	1.3627	0.0063	1.2447	0.0222	1.143	0.2344	1.1993	0.0445
98	12	Protein LOC360919	F7FAY5	LOC360919	12	22.5	6	0.8287	0.1486	0.7687	0.0404	0.8405	0.1026	0.9003	0.1938	0.8338	0.0501	0.81	0.1337
99	12	C-reactive protein	P48199	Crp	12	51.7	12	0.9146	0.3681	0.841	0.3179	0.7413	0.0877	0.8528	0.3722	1.0414	0.7081	0.8119	0.2496
100	12	Ig lambda-2 chain C region	P20767	-	12	87.5	10	0.7947	0.0237	0.7526	0.0327	0.706	0.0467	0.8064	0.2414	0.7978	0.1763	0.7801	0.075
101	11.49	Protein RGD1564515 (Fragment)	F1LYQ4	RGD1564515	11.49	49.6	7	0.9217	0.3853	0.9075	0.3449	0.6198	0.0036	0.7066	0.004	1.1348	0.2797	1.1287	0.2235
102	11.39	α-1-acid glycoprotein	P02764	Orm1	11.39	39.5	8	2.7066	0.0001	2.4906	0.0001	0.612	0.0601	0.6809	0.0203	0.66	0.0189	0.6251	0.1439
103	11.09	Hemoglobin subunit α-1/2	P01946	Hba1	11.09	57	8	0.8167	0.0274	0.7368	0.0058	0.7451	0.0134	1.028	0.6931	1.0161	0.816	0.8739	0.4068
104	11.05	Creatine kinase M-type	P00564	Ckm	11.05	31.5	6	0.667	0.003	0.7896	0.0314	1.3548	0.0218	1.2425	0.0263	1.1005	0.325	1.1285	0.1489
105	10.93	Attractin	Q99J86	Atrn	10.94	24.3	6	1.016	0.874	1.1324	0.1516	1.0949	0.2407	1.1231	0.2165	1.0717	0.359	1.0861	0.2859
106	10.8	Ac1873	Q7TQ70	Fga	10.8	34.5	5	1.0627	0.3497	1.0806	0.3137	0.9289	0.3462	0.959	0.5139	1.006	0.9496	0.9623	0.7014
107	10.57	Fibulin 1 (Predicted)	D3ZQ25	Fbln1	10.57	30.2	6	1.1392	0.154	1.1613	0.0655	1.4706	0.013	1.3179	0.007	1.077	0.5799	1.1058	0.2391
108	10.5	Filamin α	C0JPT7	Flna	10.53	20.2	6	1.0408	0.5303	1.1059	0.4644	1.0004	0.999	0.8529	0.2013	0.8276	0.228	0.9367	0.5947
109	10.04	Complement C1q subcomponent subunit A	P31720	C1qa	10.04	45.3	6	0.9786	0.8893	1.0106	0.948	0.9692	0.8808	1.1255	0.5261	0.9926	0.9641	1.1146	0.6484
110	10	Uncharacterized protein (Fragment)	M0RA79	-	10.05	74.8	8	0.8437	0.4141	0.8107	0.1339	0.7329	0.0888	0.8865	0.3068	0.8869	0.3359	0.8362	0.2105
111	10	Protein Mgam	D3ZTX4	Mgam	10	9.6	6	0.93	0.4143	0.9655	0.808	1.1774	0.1079	1.1381	0.2055	0.9555	0.7064	0.9457	0.8397
112	9.62	Hepatocyte growth factor activator	Q5EBA7	Hgfac	9.68	17.2	6	1.049	0.6086	1.181	0.068	1.4812	0.1296	1.2098	0.0467	1.0259	0.7204	1.0119	0.8684
113	9.59	Vinculin	R9PXU6	Vcl	9.61	24.7	5	0.9774	0.8104	1.3728	0.0906	1.0546	0.7179	1.21	0.0755	0.7863	0.0936	1.1458	0.1211
114	9.54	Fructose-bisphosphate aldolase A	P05065	Aldoa	9.54	38.2	6	1.0227	0.8902	1.0134	0.9317	1.3352	0.3923	1.2057	0.0884	0.9798	0.8581	1.0316	0.8562
115	8.96	Serum amyloid P-component	P23680	Apcs	8.96	50.9	5	0.9224	0.3114	0.9451	0.4659	0.7546	0.0899	0.9813	0.8036	0.9066	0.4202	0.8703	0.1977
116	8.86	RCG61833	F1LQS6	Xdh	8.86	17.4	5	1.0689	0.8066	1.1085	0.2335	1.2977	0.0791	1.0493	0.6812	1.0062	0.9701	1.0623	0.6946
117	8.68	Protein Proz	G3V8K8	Proz	8.68	19.7	5	1.0324	0.9078	1.0308	0.8075	1.2687	0.7113	1.0574	0.7911	1.0225	0.8678	0.9675	0.8178
118	8.33	Bridging integrator 2	Q68FR2	Bin2	8.33	35.5	5	1.4461	0.0648	1.1559	0.4825	1.2304	0.1053	1.0226	0.8365	0.8545	0.311	0.7621	0.3916
119	8.31	Keratin, type II cytoskeletal 1	Q6IMF3	Krt1	8.31	27.7	7	1.6938	0.0272	1.6324	0.0309	1.0501	0.6347	0.9291	0.5465	1.0856	0.4514	0.9845	0.9271
120	8.26	Protein Hps5	F7EHL9	Hps5	8.26	20.9	6	0.9508	0.4982	0.8472	0.1133	0.8176	0.0971	0.884	0.1962	1.0429	0.54	0.9398	0.3852
121	8.09	Uncharacterized protein (Fragment)	F1LPR6	-	8.09	40	4	1.1029	0.2955	1.36	0.0141	1.3411	0.0927	1.2311	0.0574	1.2144	0.3038	1.1562	0.2204
122	8.03	Protein C1r (Fragment)	D4A1T6	C1r	8.03	19.4	4	1.0183	0.8768	1.2881	0.179	1.3383	0.0139	1.4667	0.0395	1.1023	0.4593	1.4046	0.1791
123	8.02	Uncharacterized protein (Fragment)	M0R9U2	-	8.02	72.5	4	0.9267	0.7776	0.8304	0.3694	0.6751	0.1514	0.746	0.0547	0.8051	0.1085	0.7796	0.0807
124	8.01	T-kininogen 1	P01048	Map1	38.43	63.3	33	1.4604	0.1537	1.3104	0.1702	0.3977	0.0143	0.5	0.0213	0.6452	0.5082	0.6053	0.4296
125	8	RCG21092	F1M0U4	rCG_21092	8.05	58	4	0.8598	0.6197	0.9101	0.4302	0.8225	0.5448	0.771	0.1102	0.7638	0.2529	0.7558	0.1663
126	8	Apolipoprotein A-II	P04638	Apoa2	8.01	57.8	8	0.8499	0.2513	0.8526	0.3343	0.6705	0.1007	0.8501	0.3692	1.0022	0.9935	1.0087	0.9681
127	8	Complement factor properdin	B0BNN4	Cfp	8	26	4	0.9174	0.3958	0.8541	0.2829	0.9379	0.7341	0.9428	0.6006	0.955	0.7269	0.8961	0.5569
128	8	14-3-3 protein zeta/delta	P63102	Ywhaz	8	36.7	4	1.0108	0.9361	1.5505	0.0475	1.2168	0.4729	1.1799	0.2339	0.8246	0.4139	1.2636	0.5424
129	8	Complement factor D	G3V7H3	Cfd	8	39.5	4	0.9911	0.9445	1	1	0.8486	0.4713	0.8769	0.4964	1.1342	0.5098	1.0369	0.8146
130	8	Retinol-binding protein 4	P04916	Rbp4	8	24.4	4	0.8334	0.8275	0.8403	0.5625	1.168	0.7667	1.0576	0.7148	0.976	0.8656	1.0078	0.9679
131	8	Transgelin-2	Q5XFX0	Tagln2	8	43.2	4	1.0893	0.5396	1.1495	0.1892	1.3627	0.4318	1.5903	0.136	0.9618	0.6952	0.9489	0.6731
132	7.8	Protein LOC299567	M0R485	LOC299567	7.8	28.7	4	0.9282	0.4217	0.9754	0.8619	0.8916	0.5451	0.9391	0.6435	0.9186	0.3643	0.7294	0.2044
133	7.69	Pyruvate kinase PKM	P11980	Pkm	7.69	30.9	4	1.182	0.1841	1.2971	0.0118	1.3457	0.0865	1.1825	0.3254	1.1891	0.126	1.2489	0.0359
134	7.48	Uncharacterized protein (Fragment)	M0R3Y8	-	9.6	69.2	6	1.1179	0.5677	1.0584	0.6685	1.1526	0.6343	1.1935	0.3244	0.9236	0.5696	1.1066	0.4922
135	7.32	Transthyretin	P02767	Ttr	7.32	66.7	5	0.9053	0.396	0.8713	0.4902	1.0482	0.5834	1.354	0.1819	1.2121	0.0767	1.1508	0.3948
136	7.21	Uncharacterized protein (Fragment)	M0RAB8	-	7.21	69	4	1.0913	0.6767	1.0194	0.8812	1.1262	0.4502	1.1549	0.6836	0.8485	0.3538	1.0154	0.9368
137	7.07	Complement component 8, gamma polypeptide (Predicted), isoform CRA_a	D3ZPI8	C8g	7.07	56.7	4	0.9626	0.6053	1.0059	0.9357	0.9762	0.7527	1.0192	0.8193	0.951	0.61	1.0317	0.7338
138	6.68	Complement C1s subcomponent	G3V7L3	C1s	6.68	16.4	4	1.1845	0.3534	1.0588	0.6492	1.3234	0.4473	0.8287	0.0849	1.1005	0.6566	0.9674	0.6835
139	6.49	Ig gamma-1 chain C region	P20759	-	16.83	54.9	19	0.6701	0.1122	0.8494	0.4903	0.7995	0.2799	0.8239	0.3978	0.6237	0.2201	0.7156	0.4212
140	6.43	Protein S (α), isoform CRA_b	M0R5R0	Pros1	6.44	28.6	5	1.1354	0.1552	0.9333	0.6276	0.9584	0.7562	0.9931	0.9263	1.0474	0.5333	0.958	0.7034
141	6.07	Biotinidase	Q5FVF9	Btd	6.07	19	4	0.8384	0.1391	1.135	0.2146	1.1415	0.2109	1.2025	0.1114	0.7647	0.2094	1.0873	0.3784
142	6.06	Lecithin cholesterol acyltransferase	O35849	Lcat	6.07	18.2	4	1.1273	0.719	0.9429	0.7687	1.1259	0.5459	1.0167	0.9117	1.1038	0.8132	1.0586	0.5837
143	6.02	Protein LOC100912012	D3ZUU6	LOC100912012	6.02	31.2	3	1.0502	0.6093	0.9795	0.8863	1.3606	0.0635	0.9561	0.6359	1.3043	0.1387	1.4503	0.2548
144	6	Uncharacterized protein (Fragment)	F1M5X4	LOC100362687	6.04	52.4	3	1.1044	0.5791	1.0171	0.9495	0.6401	0.3312	0.6845	0.2194	0.7514	0.6276	0.6525	0.5084
145	6	Mannan-binding lectin serine protease 1	Q8CHN8	Masp1	6	21.7	3	1.1509	0.3803	1.1424	0.4374	1.0794	0.4688	1.1494	0.2495	1.1394	0.2741	1.0675	0.5319
146	6	Ab2-001	Q7TMC0	Mbl2	6	27.5	3	0.8101	0.2764	0.9034	0.522	1.0545	0.7711	1.0672	0.6817	0.9647	0.7448	1.0124	0.9147
147	6	Apolipoprotein N	Q5M890	Apon	6	38.4	4	0.8759	0.25	1.0211	0.8437	1.7063	0.1613	1.4972	0.309	1.4422	0.0708	1.4017	0.0544
148	6	LRRGT00077	Q6TUG7	RGD1310507	6	23.2	3	0.9962	0.9748	1.0056	0.9727	0.9462	0.6552	0.9993	0.9956	1.0375	0.7639	1.0287	0.8158
149	6	Ig delta chain C region (Fragment)	P01883	-	6	34.2	4	1.0573	0.6534	1.0955	0.4908	0.6397	0.3027	0.8369	0.5324	0.6365	0.3478	0.7304	0.3163
150	6	Uncharacterized protein	M0R4Z4	-	6	37.2	3	0.9146	0.5363	0.7482	0.2112	0.6206	0.1401	0.6879	0.2039	0.8671	0.6986	0.8634	0.6774
151	6	Platelet factor 4	P06765	Pf4	6	47.6	3	0.9485	0.6266	0.8467	0.3623	0.7565	0.3234	0.9384	0.6154	1.2618	0.1448	1.1662	0.2405
152	6	Uncharacterized protein (Fragment)	F1LTD1	-	6	43.9	3	0.7829	0.2264	0.8254	0.5141	0.7259	0.4245	0.7807	0.405	0.7227	0.2848	0.8026	0.4174
153	6	Uncharacterized protein	D4A4L6	-	6	37.6	4	0.9295	0.7848	0.9126	0.4991	0.7826	0.1173	0.8312	0.1864	0.8617	0.4153	0.7851	0.377
154	5.92	Uncharacterized protein	D3ZPL2	-	5.92	44.7	8	0.9041	0.5063	0.9564	0.7394	1.0223	0.8644	1.1394	0.4234	1.0059	0.964	1.0914	0.5553
155	5.56	EGF-containing fibulin-like extracellular matrix protein 1	Q6AXN2	Efemp1	5.56	22.1	3	1.1748	0.2551	1.1661	0.1431	1.4651	0.0308	1.3829	0.0411	1.0604	0.6774	1.0817	0.5679
156	5.51	Complement C1q subcomponent subunit B	G3V7N9	C1qb	5.51	28.5	5	1.013	0.9401	1.0252	0.8451	1.2725	0.1656	1.2906	0.1284	1.2675	0.1454	1.334	0.1038
157	5.33	Protein Mmrn1	D4A3E0	Mmrn1	5.33	24.7	3	1.0915	0.3941	1.0404	0.7634	1.5875	0.0976	1.2952	0.1328	1.2423	0.1446	1.1235	0.2898
158	5.32	β-enolase	P15429	Eno3	5.33	28.8	3	0.5718	-	0.967	-	1.8704	-	1.6596	-	0.9939	-	1.5376
159	5.32	Protein Cfhr3 (Fragment)	F1LWS4	LOC683745	5.32	15.8	3	-	-	-	-	-	-	-	-	-	-	-	-
160	5.22	78 kDa glucose-regulated protein	P06761	Hspa5	5.22	19.4	3	1.1568	0.2232	0.9095	0.5751	1.2577	0.2117	0.9362	0.689	0.9422	0.554	0.852	0.341
161	5.18	Uncharacterized protein (Fragment)	F1LZ11	-	5.21	44.4	3	0.8849	0.2975	0.8509	0.2719	0.7373	0.0736	0.7786	0.2111	0.6639	0.0423	0.6812	0.0883
162	5.07	Sulfated glycoprotein 1	F7EPE0	Psap	5.09	20.7	3	0.981	0.8353	0.9051	0.345	0.7496	0.2329	1.0474	0.7339	0.9628	0.8483	1.2083	0.2427
163	4.63	Tropomyosin α-4 chain	P09495	Tpm4	4.64	33.5	3	1.0982	0.2338	1.0789	0.7759	0.9055	0.7579	0.9118	0.8032	0.8134	0.8266	0.8608	0.4784
164	4.51	Collagen α-1(I) chain	P02454	Col1a1	4.51	20.6	3	1.0811	0.8671	0.9987	0.9942	1.7414	0.2818	1.1436	0.3264	1.1926	0.2312	1.1048	0.4393
165	4.49	Apolipoprotein C-II (Predicted)	G3V8D4	Apoc2	4.49	40.2	4	0.9183	0.5427	0.8235	0.4119	0.8737	0.8519	1.1393	0.7666	1.2856	0.5412	1.3014	0.6211
166	4.46	Keratin, type II cytoskeletal 75	Q6IG05	Krt75	7.03	27.5	6	1.1245	0.6979	1.1568	0.2505	1.6097	0.441	1.0654	0.5584	1.0624	0.7931	1.2061	0.5222
167	4.41	Apolipoprotein M	P14630	Apom	4.41	39	4	0.81	0.2871	0.9534	0.6496	1.1127	0.7038	0.9578	0.8688	1.09	0.5848	0.9597	0.7151
168	4.25	Uncharacterized protein (Fragment)	M0R7Q2	-	4.29	35.7	2	0.6901	0.2923	0.8719	0.4575	0.6045	0.0554	0.7349	0.0859	0.6471	0.1672	0.7398	0.288
169	4.2	Extracellular superoxide dismutase [Cu-Zn]	Q08420	Sod3	4.2	29.5	2	0.9223	0.4659	1.0249	0.8107	0.9215	0.4586	1.1464	0.2711	1.089	0.4492	1.0235	0.8882
170	4.17	Protein C	Q68FY8	Proc	4.17	22.1	2	1.3543	0.0125	1.3152	0.0435	1.5255	0.0416	1.1922	0.1013	1.1584	0.3804	1.0367	0.6865
171	4.11	Fibrinogen gamma chain	P02680	Fgg	4.11	16.6	3	1.2114	0.1508	1.2903	0.0918	1.0608	0.5518	0.9833	0.8577	0.8991	0.3299	0.8696	0.2336
172	4.11	Ig kappa chain V region S211	P01681	-	4.11	50.5	3	0.8533	-	0.7393	-	1.4556	-	1.7103	-	0.9957	-	0.9652	-
173	4.02	Mannosidase 1, α (Predicted), isoform CRA_a	G3V9N9	Man1a1	4.02	11.9	2	1.0233	0.8498	1.1692	0.3178	1.2242	0.3023	1.0528	0.6535	1.049	0.8378	1.0222	0.845
174	4.02	Uncharacterized protein (Fragment)	F1M195	-	4.02	42.4	3	0.8524	0.2354	0.8619	0.3563	0.897	0.3675	0.9706	0.8795	0.8291	0.21	1.0001	0.9992
175	4.02	Uncharacterized protein (Fragment)	F1M8N5	-	4.02	41.7	2	0.7168	-	0.6454	-	0.7251	-	0.8804	-	0.9425	-	0.8006	-
176	4.01	Uncharacterized protein (Fragment)	F1M2W3	-	4.01	56.5	2	1.1122	0.513	0.9888	0.9354	1.0144	0.968	0.8715	0.682	0.9345	0.7546	0.8782	0.6929
177	4.01	Uncharacterized protein (Fragment)	M0R628	-	4.01	51.4	2	1.2932	0.3153	1.3175	0.2662	0.6259	0.4737	0.7107	0.3853	1.1269	0.7543	0.9925	0.9869
178	4	Hemoglobin subunit β-2	P11517	-	16	69.4	12	0.9082	0.5091	0.9007	0.4821	0.7564	0.5531	0.7495	0.5718	0.959	0.9093	0.8916	0.7369
179	4	Uncharacterized protein (Fragment)	M0R5S4	-	8.05	68.6	6	0.5169	-	0.5145	-	0.6292	-	0.6632	-	0.5835	-	0.6171	-
180	4	Protein Hbb-b1	Q62669	Hbb-b1	8	52.4	6	0.8367	-	0.954	-	1.0359	-	1.367	-	1.2384	-	1.4099	-
181	4	Thyroxine-binding globulin	P35577	Serpina7	4.18	26.8	2	1.2869	0.3344	1.1982	0.5023	1.0549	0.8005	0.9419	0.777	0.9007	0.6005	0.8981	0.4771
182	4	Uncharacterized protein (Fragment)	M0RCK5	-	4.04	49.1	3	2.6966	-	1.7053	-	0.7926	-	1.0045	-	2.443	-	1.5015	-
183	4	Uncharacterized protein (Fragment)	F1LYA8	-	4.04	53.5	2	1.4387	-	1.0975	-	1.5126	-	0.6901	-	0.733	-	0.9996	-
184	4	Uncharacterized protein (Fragment)	M0R9F4	-	4.04	27.3	4	0.5508	-	0.619	-	0.7639	-	0.6237	-	0.5981	-	0.6634	-
185	4	Uncharacterized protein (Fragment)	M0R709	-	4.03	39.8	3	0.7539	0.2733	0.6789	0.3006	0.8194	0.7221	0.8063	0.3439	0.6776	0.368	0.6526	0.3482
186	4	Coagulation factor XIII A chain	G3V811	F13a1	4.02	20.6	2	0.818	0.3039	0.9575	0.7399	1.2508	0.2662	1.0921	0.7795	1.0362	0.7819	0.9396	0.6466
187	4	LRRGT00086	Q6TUF8	Rattus norvegicus	4.01	17.5	2	1.3298	0.2546	1.2529	0.5017	1.2672	0.3467	1.0488	0.7956	1.117	0.5255	0.9999	0.9994
188	4	Protein LOC100912707 (Fragment)	F1LZH0	LOC100912707	4.01	64.2	5	1.0899	0.5508	1.0265	0.9071	0.9318	0.6093	0.9868	0.9159	0.8357	0.4809	0.8652	0.5863
189	4	Uncharacterized protein (Fragment)	F1M229	-	4.01	23.6	2	0.788	0.2506	0.7465	0.2076	0.6494	0.3078	0.7255	0.1903	0.6485	0.1433	0.676	0.1575
190	4	Anionic trypsin-1	P00762	Prss1	4.01	18.7	5	1.2371	0.4163	0.9519	0.713	0.8539	0.5304	1.067	0.8228	0.9246	0.7933	0.926	0.7397
191	4	Uncharacterized protein	D3ZC54	-	4.01	26.5	2	0.8493	0.6209	0.8753	0.7034	0.826	0.4007	0.8627	0.379	0.7657	0.2289	0.7883	0.2536
192	4	Lymphocyte cytosolic protein 1	Q5XI38	Lcp1	4	21.7	2	1.3599	0.2366	1.0816	0.8065	2.1376	0.2919	0.5954	0.4878	1.024	0.876	0.4697	0.4424
193	4	Coronin-1A	Q91ZN1	Coro1a	4	20.6	2	1.1378	0.4592	1.6872	0.119	1.2475	0.363	1.5673	0.2617	1.0716	0.8541	1.4651	0.1614
194	4	Protein Amy1a	E9PSQ1	Amy1a	4	18.9	2	1.2315		1.2643		1.3947		1.4991		1.6145		1.5414
195	4	Profilin-1	P62963	Pfn1	4	48.6	2	1.2167	0.3374	1.0148	0.9187	0.8031	0.4924	0.8676	0.5156	1.1633	0.4654	0.8788	0.5255
196	4	Growth hormone receptor	P16310	Ghr	4	9.9	2	1.0292	-	0.9788	-	1.0565	-	1.1597	-	1.2444	-	1.0784	-
197	4	Uncharacterized protein	M0R816	-	4	38.3	2	0.7671	0.23	0.7928	0.2585	0.826	0.3078	0.9293	0.5975	0.9731	0.8928	0.8721	0.4015
198	4	Uncharacterized protein	F1M0B7	LOC100361705	4	38.7	2	0.9821	0.9258	1.117	0.7392	1.1914	0.8103	1.006	0.9686	1.082	0.6321	1.0568	0.7279
199	4	Immunoglobulin joining chain	G3V6G1	Igj	4	23.3	3	0.9718	0.8256	0.9232	0.5753	0.7613	0.2242	0.8277	0.4421	0.759	0.4025	0.8594	0.5284
200	4	Uncharacterized protein (Fragment)	M0RBD5	-	4	40	4	0.623	-	0.7373	-	0.7124	-	0.8039	-	0.6619	-	0.8246	-
201	4	Uncharacterized protein	D3ZEP5	-	4	23.9	3	0.6754	0.1721	0.5347	0.2027	0.507	0.1989	0.6445	0.2061	0.5819	0.1255	0.5661	0.1199
202	4	Apolipoprotein C-I	P19939	Apoc1	4	22.7	3	0.7837	0.2644	0.6655	0.1642	0.7314	0.2104	0.983	0.9	1.084	0.5921	0.9405	0.6736
203	4	Cystatin-C	P14841	Cst3	4	20	2	0.9456	0.6804	1.1518	0.3979	0.9855	0.9092	0.9734	0.8664	1.0059	0.9629	0.9909	0.9429
204	4	Serglycin	P04917	Srgn	4	20.1	2	0.8279	0.6747	1.3382	0.2916	1.1142	0.7366	1.272	0.3152	0.995	0.9684	1.2338	0.4827
205	3.72	Peptidyl-prolyl cis-trans isomerase A	P10111	-	3.72	55.5	2	1.179	0.2762	1.3823	0.1387	1.1582	0.2847	0.9108	0.5616	1.0123	0.9003	0.8111	0.2131
206	3.71	C-type lectin domain family 11 member A	O88201	Clec11a	3.71	28.4	2	0.9536	0.6214	1.0926	0.7619	1.6918	0.3612	1.4225	0.4078	0.7996	0.5284	0.9844	0.8686
207	3.64	Selenoprotein P	P25236	Sepp1	3.64	9.1	3	1.0367	0.8564	0.9754	0.9413	1.1928	0.3999	1.02	0.887	0.84	0.4091	0.6408	0.2929
208	3.62	Carbonic anhydrase 3	P14141	Ca3	3.62	15.8	2	0.7316	0.3709	0.7506	0.2362	1.2895	0.2647	0.8836	0.4896	1.2393	0.3058	0.9258	0.6207
209	3.51	Fibrinogen-like protein 1	Q5M8C6	Fgl1	3.51	17.8	3	1.457	0.0452	1.5372	0.0365	1.0744	0.7115	1.0811	0.5076	0.9708	0.7546	1.0716	0.6079
210	3.23	Uncharacterized protein	M0RBP7	-	3.23	25.4	2	0.7221	0.2896	0.6013	0.1259	0.616	0.2787	0.7197	0.323	0.7706	0.5451	0.7778	0.5256
211	3.17	RCG64160	D3ZBB2	LOC100361952	5.25	27.1	3	0.997	0.9758	0.8841	0.436	0.8373	0.5608	0.6653	0.0627	0.5666	0.0388	0.5704	0.0239
212	3.15	Carboxylesterase 1C	D3ZGK7	Ces1c	35.92	41	27	0.8048	-	0.8747	-	0.757	-	0.6975	-	1.3386	-	1.1109	-
213	3.15	Insulin-like growth factor I	F8WFZ5	Igf1	3.15	41.8	2	1.1285	0.3201	1.0995	0.4055	1.0663	0.8202	0.973	0.8295	0.8568	0.2327	0.8821	0.3688
214	3.11	Vascular cell adhesion protein 1	P29534	Vcam1	3.12	15.8	2	1.5351	-	1.3904	-	1.0785	-	0.8951	-	1.1601	-	1.0036	-
215	3.09	Histone H4	P62804	Hist1h4b	3.09	35	2	1.1224	0.3254	1.09	0.4411	5.2216	0.0251	4.6738	0.0306	1.0006	0.9955	0.964	0.8538
216	3.07	Xaa-Pro dipeptidase	Q5I0D7	Pepd	3.07	28.1	2	1.1169	0.6791	1.2053	0.1977	1.483	0.0837	1.0899	0.4428	1.0217	0.8597	0.8905	0.4562
217	3.06	Keratin, type II cytoskeletal 2 epidermal	M3ZCQ4	Krt2	5.58	26.4	5	2.2204	0.1799	2.2642	0.2192	0.9536	0.7568	0.9839	0.9137	0.8128	0.3307	0.8919	0.5131
218	2.91	Keratin, type I cytoskeletal 14	Q6IFV1	Krt14	7.05	34.9	4	1.0112	0.9469	1.2768	0.2504	1.3447	0.4333	1.2709	0.4519	1.6338	0.4717	1.8349	0.2754
219	2.9	Carboxypeptidase B2	Q9EQV9	Cpb2	2.9	29.6	2	1.008	0.9303	0.9639	0.6612	1.108	0.6019	1.0058	0.9442	0.9819	0.8825	0.9804	0.8108
220	2.86	Uncharacterized protein (Fragment)	M0R4X3	-	2.89	42.7	2	1.0075	0.9535	0.8876	0.4667	0.832	0.3197	0.9254	0.5885	1.1165	0.6901	1.0161	0.9008
221	2.81	RCG45400	G3V7C6	Tubb4b	2.81	22.3	2	0.6761	-	0.6472	-	1.5059	-	1.6412	-	0.7607	-	0.9381	-
222	2.75	Uncharacterized protein (Fragment)	M0RBV1	-	2.75	19.4	2	0.9888	0.9598	1.112	0.8548	1.1883	0.7146	1.7295	0.5652	0.8972	0.4929	0.9813	0.8932
223	2.68	Protein Icoslg	F1LVL2	Icoslg	2.68	11.8	2	1.0583	0.6749	1.1863	0.3377	1.5329	0.2633	1.5461	0.3088	1.0435	0.7451	1.1357	0.5955
224	2.54	Uncharacterized protein	M0R6R6	-	2.54	24.4	2	0.9388	0.6434	1.0101	0.9378	0.7899	0.2594	1.0355	0.7885	0.7783	0.4204	0.8996	0.4846
225	2.52	Guanine deaminase	Q9JKB7	Gda	2.53	27.1	2	1.3852	0.5742	1.1662	0.3656	1.5082	0.2574	0.9566	0.7326	1.1786	0.7638	1.1091	0.4861
226	2.48	Mannan-binding lectin serine peptidase 2	A2VCV7	Masp2	2.48	15.5	2	0.8877	0.2979	0.9944	0.9532	1.0106	0.9113	0.8961	0.3248	1.0002	0.9982	0.9863	0.8848
227	2.46	Ig gamma-2C chain C region	P20762	-	2.48	20.7	3	1.337	0.2959	1.1785	0.3577	1.5145	0.1595	1.1545	0.3979	1.2369	0.3938	1.186	0.3484
228	2.44	Uncharacterized protein (Fragment)	M0RD98	-	4	39.3	2	0.9305	-	0.7096	-	0.7264	-	0.6367	-	0.9014	-	0.7157	-
229	2.43	Protein Pltp	E9PSP1	Pltp	2.44	13.5	2	0.9498	0.8	1.4267	0.1868	1.2026	0.3335	1.3318	0.3589	1.1734	0.7383	1.2927	0.539
230	2.34	Uncharacterized protein	D3ZXH4	-	2.35	31.6	2	-	-	-	-	-	-	-	-	-	-	-	-
231	2.31	Superoxide dismutase [Cu-Zn]	P07632	Sod1	2.31	27.3	1	1.0898	0.5442	1.1544	0.384	1.5807	0.1354	1.1169	0.4647	0.9998	0.9986	0.869	0.3906
232	2.24	Major urinary protein	P02761	-	2.24	45.9	2	0.9112	0.5853	0.7975	0.1147	1.3525	0.0695	1.3335	0.0786	1.452	0.0473	1.221	0.1397
233	2.23	Ninein (Predicted), isoform CRA_a	D4A1J7	LOC100911256	2.23	19.9	1	1.2857	0.5238	1.2457	0.3357	0.9288	0.9586	1.1239	0.9176	1.0426	0.7989	1.131	0.5099
234	2.23	Complement C1q subcomponent subunit C	P31722	C1qc	2.23	30.6	2	-	-	-	-	-	-	-	-	-	-	-	-
235	2.22	Uncharacterized protein	D3ZFF8	-	2.22	28.6	1	0.7308	-	0.5708	-	0.4834	-	0.533	-	0.4528	-	0.4828	-
236	2.18	Insulin-like growth factor-binding protein 3 (Fragment)	F1LRU0	Igfbp3	2.18	37.8	1	0.9801	0.8865	1.1399	0.4536	1.0687	0.7304	1.2757	0.5802	0.9615	0.8651	1.1914	0.4834
237	2.18	Cofilin-1	P45592	Cfl1	2.18	25.3	1	1.1753	0.3553	1.1454	0.4052	1.1311	0.4354	1.2095	0.3084	1.2387	0.6206	0.996	0.98
238	2.16	Protein Cfhr3	F1M296	LOC683745	4.2	22.9	2	0.7728	0.3532	1.2448	0.3221	0.9173	0.8846	1.2292	0.6599	0.8456	0.7418	1.144	0.7264
239	2.03	Serine protease inhibitor A3L	P05544	Serpina3l	40.21	58.1	29	0.8221	0.3768	0.7371	0.2589	0.8767	0.5368	1.0134	0.9356	1.7753	0.1434	1.7851	0.1425
240	2.03	Protein Dst (Fragment)	F1M118	Dst	2.03	14.3	1	-	-	-	-	-	-	-	-	-	-	-	-
241	2.03	Proteasome subunit β type-10	Q4KM35	Psmb10	2.03	35.5	1	0.9404	0.8489	1.1956	0.326	1.1939	0.3289	0.9061	0.6624	0.8587	0.6461	0.749	0.2153
242	2.02	Ig heavy chain V region IR2	P01805	-	2.04	33.8	1	0.8371	0.3356	0.8891	0.5431	1.1676	0.4135	1.0842	0.6079	0.971	0.8229	0.9551	0.733
243	2.02	Periostin, osteoblast specific factor (Predicted), isoform CRA_a	D3ZAF5	Postn	2.02	14.1	1	1.3246	0.2459	1.3508	0.2171	1.804	0.2282	1.4663	0.6285	1.159	0.7933	1.2539	0.3575
244	2.02	Uncharacterized protein	M0RAZ3	LOC100912228	2.02	37.1	1	0.9293	0.7901	1.1433	0.438	0.7519	0.4417	1.1784	0.3824	0.8115	0.3178	1.0466	0.7525
245	2.02	Uncharacterized protein	D3ZK03	-	2.02	18.3	1	1.0067	0.9773	0.9113	0.8215	0.8482	0.8193	0.7979	0.7521	0.8486	0.4031	0.9685	0.9226
246	2.01	Keratin, type II cytoskeletal 6A	Q4FZU2	Krt6a	4.87	23.2	4	1.7926	-	1.7872	-	1.3622	-	0.881	-	1.0579	-	0.9798	-
247	2.01	Uncharacterized protein (Fragment)	F1M4R1	-	2.03	21.7	2	0.7746	-	0.7943	-	0.7218	-	0.7104	-	0.7323	-	0.7663	-
248	2.01	PHD finger protein 15 (Predicted)	G3V9F5	Phf15	2.01	16.2	1	1.0993	-	1.0656	-	1.0179	-	1.1122	-	0.892	-	0.9095	-
249	2.01	Protein disulfide-isomerase	P04785	P4hb	2.01	19.5	1	0.9917	0.9534	1.8381	0.196	0.8764	0.4545	1.159	0.5181	0.7848	0.3543	1.0407	0.8679
250	2.01	Cytosol aminopeptidase	Q68FS4	Lap3	2.01	22.9	1	1.0504	0.7124	1.5909	0.3416	1.7677	0.2476	1.0398	0.849	1.0622	0.6574	0.8478	0.7799
251	2.01	Complement C1r subcomponent-like protein (Fragment)	F1LP96	C1rl	2.01	16.5	1	0.9595	0.7623	1.1616	0.71	1.0726	0.8322	1.0706	0.8634	0.8957	0.4878	0.9811	0.9673
252	2.01	Serpin A11	Q7TPA5	Serpina11	2.01	15.2	1	1.0592	0.8127	1.3148	0.3473	1.5055	0.4869	1.031	0.8129	1.1656	0.7693	0.9813	0.9169
253	2.01	Leucine-rich α-2-glycoprotein 1	Q5I0E1	Lrg1	2.01	16.9	1	1.5078	0.1602	1.5092	0.4142	1.5049	0.4752	1.4358	0.3574	1.2038	0.6774	1.2742	0.247
254	2.01	Histone H2A type 1-F	Q64598	-	2.01	22.3	1	1.2543	0.5385	0.8085	0.636	8.3883	0.1619	8.0654	0.0354	1.191	0.8077	1.2469	0.3077
255	2	Complement factor B, isoform CRA_b	G3V615	C2	48.41	52	31	1.0259	-	1.1654	-	1.2429	-	0.8799	-	1.4346	-	0.9597	-
256	2	RCG21066	D3ZJW6	rCG_21066	6.04	57.3	5	0.5795	-	0.7386	-	1.0213	-	0.8758	-	0.6064	-	0.6898	-
257	2	Protein LOC100912547	M0R944	LOC100912547	6.04	44.1	4	0.9363	-	0.9487	-	0.5748	-	0.64	-	0.6875	-	0.761	-
258	2	Uncharacterized protein (Fragment)	M0R496	-	4.04	44.2	4	0.7698	-	1.2048	-	0.8347	-	0.9058	-	0.7378	-	1.0147	-
259	2	14-3-3 protein β/α	P35213	Ywhab	4	22.8	2	1.0677	-	1.3479	-	1.6678	-	1.4124	-	1.2595	-	1.4973	-
260	2	Uncharacterized protein (Fragment)	M0R7M5	-	4	29.6	2	1.0108	-	1.0347	-	1.4996	-	0.8945	-	1.0097	-	1.1488	-
261	2	Uncharacterized protein	G3V8Z5	-	4	27.1	2	0.8728	-	1.051	-	0.7285	-	0.8355	-	0.7533	-	0.9034	-
262	2	Uncharacterized protein (Fragment)	F1LWD1	LOC100359978	4	27.3	4	0.9569	-	1.6891	-	1.4651	-	0.9613	-	1.1197	-	1.578	-
263	2	Uncharacterized protein	E9PSU8	-	4	17.1	2	0.8457	-	0.8121	-	0.7502	-	0.8062	-	0.8011	-	0.7188	-
264	2	Uncharacterized protein (Fragment)	M0R8G6	-	3.86	38.1	4	1.0152	-	1.0671	-	1.0767	-	1.1973	-	1.0201	-	1.1294	-
265	2	α-enolase	P04764	Eno1	3.24	23.7	2	0.9207	-	0.9833	-	0.7307	-	0.9196	-	0.7347	-	0.6754	-
266	2	Protein LOC679312	M0R8B6	LOC679312	2.8	21.2	2	1.1445	-	1.04	-	1.8089	-	1.2772	-	1.2904	-	1.1702	-
267	2	Lipid phosphate phosphatase-related protein type 2	F1LRA5	-	2.04	21.5	1	1.6052	-	1.7364	-	1.0559	-	1.6105	-	1.3263	-	1.0628	-
268	2	Phosphoglycerate mutase 1	P25113	Pgam1	2.04	14.6	1	0.694	-	0.7254	-	1.5824	-	1.1243	-	0.8556	-	0.9801	-
269	2	Protein Casc5	D3ZNX2	Casc5	2.03	12.6	1	-	-	-	-	-	-	-	-	-	-	-
270	2	Uncharacterized protein (Fragment)	M0R7E8	-	2.03	73.5	1	0.8063	-	0.7802	-	1.0335	-	0.8352	-	0.8064	-	0.896	-
271	2	Uncharacterized protein (Fragment)	F1LXY6	-	2.03	36.7	1	0.8108	-	0.9074	-	1.1472	-	0.9431	-	1.0327	-	1.1506	-
272	2	Uncharacterized protein (Fragment)	M0R743	-	2.03	31.5	2	1.0135	-	0.8729	-	0.9455	-	0.8493	-	1.0105	-	0.9002	-
273	2	Uncharacterized protein (Fragment)	F1LWD0	-	2.03	29.3	1	0.6141	-	0.5758	-	0.6038	-	0.5481	-	0.5734	-	0.6273	-
274	2	Uncharacterized protein	D3ZWC1	LOC100362150	2.02	23.2	2	1.0189	-	0.9125	-	0.9001	-	0.8412	-	0.781	-	0.4873	-
275	2	Unconventional myosin-X	D3ZJP6	Myo10	2.01	14.9	1	0.6565	-	1.8089	-	1.3009	-	1.9579	-	0.7017	-	1.072	-
276	2	α glucosidase 2 α neutral subunit (Predicted)	D3ZAN3	Ganab	2.01	14.7	1	1.0929	-	1.0118	-	1.3982	-	0.9156	-	1.1398	-	0.9639	-
277	2	Complement component factor h-like 1	Q5I0M3	Cfhr1	2.01	9.1	1	1.3652	-	1.4809	-	1.4146	-	1.214	-	0.9603	-	1.6418	-
278	2	Protein Lyst	D3ZGP7	Lyst	2	9.6	1	1.2733	-	0.727	-	1.0229	-	0.8566	-	0.8899	-	0.8575	-
279	2	Protein Otud4	F1M7Q7	Otud4	2	19.9	1	1.4982	-	1.5287	-	1.5208	-	1.7439	-	1.1046	-	1.1638	-
280	2	Uncharacterized protein	M0RAK7	-	2	14.9	1	-	-	-	-	-	-	-	-	-	-	-	-
281	2	Polymeric immunoglobulin receptor	P15083	Pigr	2	19.9	1	1.2154	-	1	-	1.0846	-	1.1194	-	0.8756	-	1.0645	-
282	2	Angiotensin-converting enzyme	P47820	Ace	2	10.1	1	0.9775	-	1.3799	-	1.6089	-	2.3549	-	0.7566	-	1.0314	-
283	2	Membrane-bound aminopeptidase P	Q99MA2	Xpnpep2	2	17.2	1	1.1745	-	1.5209	-	1.5046	-	0.8978	-	0.9156	-	1.004	-
284	2	Protein Tex21	Q4V8E7	Tex21	2	18.7	1		-		-		-		-		-		-
285	2	Phosphoglycerate kinase 1	P16617	Pgk1	2	21.3	1	1.1563	-	1.6379	-	2.227	-	1.2813	-	0.9647	-	1.0202	-
286	2	4-trimethylaminobutyraldehyde dehydrogenase	Q9JLJ3	Aldh9a1	2	17	1	1.3996	-	1.5234	-	1.8598	-	0.878	-	1.2994	-	0.9118	-
287	2	Glucose-6-phosphate isomerase	Q6P6V0	Rattus norvegicus	2	15.8	1	0.8656	-	1.694	-	1.5184	-	1.9094	-	1.0548	-	1.8651	-
288	2	Dual specificity mitogen-activated protein kinase kinase 5	Q62862	Map2k5	2	17.9	1	1.193	-	1.0491	-	0.717	-	0.9004	-	0.8975	-	0.8865	-
289	2	Rho GDP-dissociation inhibitor 1	Q5XI73	Rattus norvegicus	2	39.2	1	0.97	-	1.4726	-	0.6786	-	1.4062	-	0.9507	-	1.1384	-
290	2	Carboxylesterase	O70177	Ces2	2	6.6	1	0.8666	-	0.848	-	0.8704	-	1.1166	-	0.9211	-	1.2418	-
291	2	Protein Tubal3	F1LUM5	Tubal3	2	20.4	1	1.2374	-	1.0162	-	3.9499	-	5.1713	-	1.1866	-	1.2478	-
292	2	Uncharacterized protein	D4AEC9	-	2	10.5	1	1.1256	-	1.4721	-	0.7539	-	0.9806	-	0.7327	-	1.0846	-
293	2	Mitochondrial ribosomal protein S35 (Predicted)	D4A9Z6	Mrps35	2	18.1	1	-	-	-	-	-	-	-	-	-	-	-	-
294	2	Uncharacterized protein	D3ZXT4	-	2	11	1	-	-	-	-	-	-	-	-	-	-	-	-
295	2	Tubulin α-1B chain	Q6P9V9	Tuba1b	2	11.5	1	1.2879	-	0.854	-	1.1216	-	0.6591	-	0.9068	-	0.5636	-
296	2	Tissue factor pathway inhibitor	Q02445	Tfpi	2	19.9	1	0.8109	-	1.3726	-	1.2859	-	1.205	-	0.877	-	1.2563	-
297	2	Mannose-binding protein A	P19999	Mbl1	2	36.6	1	0.7341	-	0.7469	-	0.7998	-	0.9305	-	1.1136	-	1.0251	-
298	2	Uncharacterized protein	M0RBX3	-	2	34.2	1	-	-	-	-	-	-	-	-	-	-	-	-
299	2	Adaptor-related protein complex 1, sigma 2 subunit (Predicted), isoform CRA_a	B2GV08	Ap1s2	2	28	1	1.2192	-	0.2234	-	0.9157	-	0.9096	-	1.2677	-	0.6691	-
300	2	β-2-microglobulin	P07151	B2m	2	32.8	1	1.0479	-	0.9611	-	1.0838	-	0.9479	-	1.2411	-	0.986	-
301	2	Parvalbumin α	P02625	Pvalb	2	40.9	1	1.0531	-	1.1739	-	2.9317	-	2.1961	-	1.7704	-	1.5895	-
302	2	Thioredoxin (Fragment)	R4GNK3	Txn1	2	35.6	1	1.1768	0.3566	1.2686	0.6656	1.1933	0.3374	1.3247	0.4047	0.924	0.6816	0.9985	0.9997
303	2	Uncharacterized protein	D3ZTD2	LOC100361174	2	26.9	1	0.8187	-	0.6087	-	0.7081	-	0.8037	-	0.8905	-	0.8447	-
304	2	Uncharacterized protein	D3ZQM9	-	2	20.3	1	0.3821	-	0.3899	-	0.9003	-	0.8456	-	1.1088	-	1.0448	-
305	2	Ras-related protein Rap-1b	Q62636	Rap1b	2	31.5	1	0.9527	-	1.4158	-	1.5831	-	1.0007	-	1.0839	-	1.4192	-
306	2	Carbonic anhydrase 2	P27139	Ca2	2	20.4	1	-	-	-	-	-	-	-	-	-	-	-	-
307	2	Uncharacterized protein	M0R9Z7	-	2	20.8	1	0.7247	-	1.1503	-	1.1239	-	1.111	-	0.7162	-	1.3875	-
308	2	Uncharacterized protein	D4A3L8	-	2	20.5	1	0.9384	-	1.0003	-	1.0271	-	1.0653	-	0.8269	-	0.88	-
309	2	Uncharacterized protein	D3ZZ08	-	2	37.5	1	1.3209	-	2.3738	-	0.5157	-	1.1129	-	0.6917	-	1.4762	-
310	2	Protein Vasn	D3ZAE6	Vasn	2	6.2	2	1.0671	-	2.0172	-	1.3474	-	1.831	-	0.7998	-	1.9564	-
311	2	Apolipoprotein C-IV	P55797	Apoc4	2	19.4	1	0.8686	-	1.0731	-	0.9572	-	1.0864	-	1.0671	-	1.1533	-
312	2	Coactosin-like protein	B0BNA5	Cotl1	2	14.8	1	1.266	-	1.2852	-	0.6651	-	0.9092	-	1.0801	-	1.0204	-
313	2	Glycosylation dependent cell adhesion molecule 1, isoform CRA_a	G3V9L4	Glycam1	2	30.1	1	1.4875	-	3.2734	-	2.7487	-	4.0792	-	1.3534	-	4.6946	-
314	2	Uncharacterized protein (Fragment)	F1LYF1	-	2	14.8	1	1.203	-	0.9523	-	0.7766	-	0.5551	-	1.0774	-	0.8075	-
315	2	Uncharacterized protein (Fragment)	F1LWW1	-	2	21.5	1	0.803	-	0.9788	-	1.66	-	1.4864	-	0.8977	-	1.0969	-
316	2	Uncharacterized protein (Fragment)	D3ZMS7	-	2	32.2	2	0.4183	-	0.9339	-	1.3894	-	0.7411	-	0.8094	-	1.1053	-
317	2	Apolipoprotein D	M0R4S2	Apod	2	13.8	1	0.5749	-	1.1731	-	0.9307	-	1.7909	-	0.8716	-	1.2187	-
318	2	Apolipoprotein C-III	P06759	Apoc3	2	25.7	1	1.0203	-	0.9327	-	1.2814	-	1.2557	-	1.3916	-	1.4751	-
319	2	Urinary protein 1	P81827	-	2	10.9	1	0.6728	-	0.8674	-	1.1694	-	1.0929	-	0.8944	-	0.8245	-
320	1.96	Uncharacterized protein (Fragment)	F1LV34	-	2.01	38.9	1	0.6741	-	0.6248	-	0.7184	-	0.8054	-	0.6119	-	0.5965	-
321	1.89	Protein LOC100364193	M0R8Q9	LOC100359993	6.04	43.2	4	0.92	-	0.8706	-	0.5771	-	0.5551	-	0.4557	-	0.5948	-
322	1.89	Uncharacterized protein (Fragment)	M0RC23	-	5.15	44.1	4	1.1361	-	0.9157	-	1.053	-	0.8503	-	1.1743	-	0.7994	-
323	1.89	Uncharacterized protein (Fragment)	F1LYU4	-	1.92	30.8	1	0.7897	-	1.0329	-	0.8058	-	0.986	-	0.8907	-	0.9012	-
324	1.89	Uncharacterized protein	M0RBK4	-	1.89	20.2	1	0.9009	-	1.1615	-	0.9602	-	0.7502	-	0.9905	-	0.9615	-
325	1.89	Uncharacterized protein (Fragment)	M0R6U4	-	1.89	41.7	1	0.9413	-	0.9718	-	1.2172	-	0.8207	-	0.8397	-	0.7246	-
326	1.89	Protein RGD1565617	F1M7I8	RGD1565617	1.89	25	1	0.86	-	1.1073	-	1.0036	-	0.8664	-	0.8875	-	0.88	-
327	1.89	Uncharacterized protein	M0R8B5	-	1.89	19.3	2	0.9804	-	1.095	-	0.7817	-	0.7361	-	0.8784	-	0.8594	-
328	1.82	Uncharacterized protein (Fragment)	F1LT85	-	4.03	42.1	2	1.0124	-	0.9442	-	0.8619	-	0.9918	-	0.778	-	0.7925	-
329	1.8	Kit ligand (Fragment)	F1LYJ6	Kitlg	1.8	19.9	1	-	-	-	-	-	-	-	-	-	-	-	-
330	1.79	Protein Lama2 (Fragment)	F1M614	Lama2	1.82	20.8	1	0.7231	-	0.9326	-	0.6196	-	0.8871	-	0.72	-	0.9268	-
331	1.77	Sarcoplasmic/endoplasmic reticulum calcium ATPase 3	D3ZHJ6	Atp2a3	1.78	22	1	1.0157	-	1.0643	-	2.2598	-	2.4414	-	1.3129	-	1.1932	-
332	1.68	General transcription factor 3C polypeptide 1	Q63505	Rattus norvegicus	1.68	14.1	1	2.1713	-	0.9678	-	0.8242	-	0.8857	-	1.2898	-	1.3397	-
333	1.38	Keratin, type II cytoskeletal 8	Q10758	Krt8	3.68	24	4	1.8767	0.4068	2.3347	0.0946	0.6178	0.5634	0.9687	0.9231	1.0715	0.6797	1.2101	0.3725
334	1.38	Protein Lrp5	F1MAD0	Lrp5	1.38	14.9	1	0.7164	-	1.2657	-	0.8829	-	1.5157	-	0.5701	-	1.0411	-
335	1.38	REVERSED Protein Sox15	D4A8K3	Sox15	1.38	13.5	1	1.0056	-	0.9264	-	0.8788	-	1.0721	-	1.1901	-	1.0482	-
336	1.34	Cathepsin B	P00787	Ctsb	1.34	13	1	1.1732	-	0.8657	-	0.813	-	1.1659	-	0.9619	-	0.9336	-
337	1.26	Myoglobin	Q9QZ76	Mb	1.29	19.5	1	0.8142	-	0.9137	-	1.7492	-	1.6002	-	1.8099	-	1.1528	-
338	1.24	Protective protein for β-galactosidase	Q6AYS3	Ctsa	1.24	7.2	1	1.7855	-	0.1894	-	100	-	100	-	0.5246	-	1.322	-
339	1.22	Ig lambda-1 chain C region	P20766	-	1.22	16.4	1	1.2778	-	1.0904	-	0.8082	-	1.0121	-	1.4804	-	1.1664	-
340	1.19	Protein Zfp74 (Fragment)	M0RDY1	Zfp74	1.19	21.6	1	1.2486	-	0.8123	-	1.8307	-	0.8746	-	1.2906	-	0.8719	-
341	1.17	Protein Lats2	D4AE19	Lats2	1.17	15.3	1	1.4033	-	1.5989	-	1.0914	-	1.2761	-	0.9853	-	1.1088	-
342	1.04	Protein LOC367390 (Fragment)	D3ZKL6	LOC367390	1.04	35.4	1	-	-	-	-	-	-	-	-	-	-	-	-
343	1.03	Protein RGD1564614	G3V7P5	Rattus norvegicus	5.24	14.2	5	-	-	-	-	-	-	-	-	-	-	-	-
344	0.95	Uncharacterized protein (Fragment)	F1M3E9	-	0.97	38.4	1	0.8272	-	1.1263	-	1.1313	-	1.0125	-	0.7469	-	0.9729	-
345	0.93	Ryanodine receptor 2	B0LPN4	Ryr2	0.93	12.8	1	-	-	-	-	-	-	-	-	-	-	-	-
346	0.9	ADP-ribosylation factor-like 5B	G3V9B1	Arl5b	0.9	19.7	1	1.1243	-	0.89	-	1.1128	-	1.1464	-	1.4343	-	1.3987	-
347	0.88	Protein Copa	G3V6T1	Copa	0.88	13.6	1	-	-	-	-	-	-	-	-	-	-	-	-
348	0.68	Uncharacterized protein	D4AC77		0.68	20.8	1	0.9643	-	1.0542	-	1.2537	-	1.1396	-	0.8399	-	1.2078	-
349	0.65	Protein Dapk1	F1LNN8	Dapk1	0.65	10.9	1	-	-	-	-	-	-	-	-	-	-	-	-
350	0.63	C4b-binding protein β chain	A0A5C5	C4bpb	0.63	21.3	1	1.1015	0.5748	1.1176	0.5277	1.1148	0.5375	1.1424	0.4723	0.836	0.3814	0.7582	0.2629
351	0.56	Uncharacterized protein	F1LVL4	LOC100363935	2.67	34.5	2	0.9251	-	0.7616	-	0.7475	-	0.714	-	0.7635	-	0.7105	-
352	0.55	REVERSED Leucine-rich repeat transmembrane neuronal protein 2 (Fragment)	M0RC63	Lrrtm2	0.55	3.1	2	0.9704	-	1.0555	-	1.0551	-	1.185	-	0.8576	-	0.8644	-
353	0.54	Fibronectin	F1LST1	Fn1	87.99	52.1	52	-	-		-		-		-		-		-
354	0.46	Uncharacterized protein	M0R4G1	-	2.55	24.8	3	0.5362	-	0.682	-	0.8425	-	0.8595	-	0.6311	-	0.7845	-
355	0.43	Complement C5 (Fragment)	P08650	C5	0.43	32.5	1	1.1777	-	1.1022	-	0.7814	-	0.8758	-	0.7985	-	0.7926	-
356	0.37	Transforming protein RhoA	P61589	Rhoa	0.37	16.1	1	0.7145	-	1.5699	-	1.1245	-	2.4262	-	0.8067	-	1.4255	-
357	0.32	Glutathione peroxidase 1	P04041	Rattus norvegicus	0.32	19.4	1	1.6323	-	1.6167	-	1.7622	-	1.3057	-	1.5545	-	0.969	-
358	0.32	Tubulin α-4A chain	Q5XIF6	Tuba4a	0.32	9.4	1	1.1397	-	0.9629	-	0.7818	-	0.7768	-	0.9335	-	0.8802	-
359	0.31	Laminin, β 3, isoform CRA_a	F1LPI5	Lamb3	0.32	17.9	1	0.7686	-	1.378	-	0.6375	-	1.0156	-	0.8768	-	1.1949	-
360	0.3	Katanin p60 ATPase-containing subunit A-like 2	F1M5A4	Katnal2	0.31	25.1	1	2.2937	-	2.3921	-	0.5595	-	0.8286	-	0.8885	-	0.9142	-
361	0.29	Uncharacterized protein	F1M663	-	0.76	33.9	2	0.6707	-	0.9458	-	0.8556	-	0.9821	-	0.8506	-	0.9509	-
362	0.29	Insulin receptor-related protein	Q64716	Insrr	0.3	15.9	1	1.8944	-	1.8503	-	0.51	-	0.6353	-	0.5162	-	0.4827	-
363	0.29	REVERSED Protein LOC687896 (Fragment)	F1LVN2	LOC687896	0.29	9.6	1	1.8891	-	1.5172	-	0.9813	-	0.9413	-	1.0629	-	0.9643	-
364	0.28	Caspase recruitment domain family, member 15 (Predicted)	D4A5W3	Nod2	0.28	14.5	1	3.2929	-	0.6154	-	37.0393	-	9.6391	-	1.4221	-	0.0105	-
365	0.27	Growth differentiation factor 9	Q9QYW4	Rattus norvegicus	0.27	13.9	0	-	-	-	-	-	-	-	-	-	-	-	-
366	0.27	Chemokine-like receptor 1	G3V625	Cmklr1	0.27	19.6	0	0.8645	-	0.863	-	0.7224	-	0.7633	-	0.7682	-	0.8011	-
367	0.26	Macrophage stimulating 1 (Hepatocyte growth factor-like)	P70521	Mst1	0.3	14.4	1	-	-	-	-	-	-	-	-	-	-	-	-
368	0.26	Uncharacterized protein (Fragment)	M0R4A3	-	0.27	24.9	1	-	-	-	-	-	-	-	-	-	-	-	-
369	0.26	REVERSED Protein Wnk3	D4A7Z8	Wnk3	0.26	12.1	0	1.9142	-	1.3777	-	1.6067	-	1.1657	-	1.0558	-	1.2493	-
370	0.25	Nestin	G3V8F8	Nes	0.25	17.1	1	-	-		-		-		-		-		-
371	0.25	REVERSED Aldehyde dehydrogenase X, mitochondrial	Q66HF8	Aldh1b1	0.25	18.1	0	1.3893	-	1.0027	-	0.6389	-	0.577	-	0.6995	-	0.5349	-
372	0.25	REVERSED Guanine nucleotide-binding protein subunit gamma	G3V6P8	Gng12	0.25	9.7	0	1.1153	-	1.1124	-	1.6513	-	1.0087	-	1.0439	-	1.0235	-
373	0.24	REVERSED SHC-transforming protein 1	G3V8S2	Shc1	0.24	16.9	0	1.1144	-	1.0302	-	0.9611	-	0.8896	-	0.9722	-	1.0058	-
374	0.24	Histone H2B	M0RBQ5	Hist3h2bb	0.24	30.2	0	0.8681	-	0.8085	-	4.951	-	4.7203	-	1.2275	-	1.1049	-
375	0.23	REVERSED Uncharacterized protein	D3ZZG6	-	0.27	11.2	0	-	-	-	-	-	-	-	-	-	-	-	-
376	0.22	REVERSED Protein Plekhh2	D3ZNS6	Plekhh2	0.22	21.2	0	-	-	-	-	-	-	-	-	-	-	-	-
377	0.21	REVERSED Protein Ankib1	D4A731	Ankib1	0.21	22.4	0	0.9326	-	0.9193	-	1.2577	-	1.0332	-	1.0923	-	1.208	-
378	0.19	Protein Catsper4	D4A0V7	Catsper4	0.19	19.6	0	1.2322	-	1.2701	-	8.7926	-	10.5313	-	1.4101	-	1.4643	-
379	0.19	Adenylyl cyclase-associated protein 1	Q08163	Cap1	0.19	11.4	0	1.1613	0.5259	1.2351	0.7327	1.1817	0.8619	1.2222	0.7544	1.0338	0.9504	0.9512	0.9051
380	0.17	REVERSED LRRGT00050	Q6TXE9	Eprs	0.17	10.8	0	-	-	-	-	-	-	-	-	-	-	-	-
381	0.17	REVERSED Lactoylglutathione lyase	Q6P7Q4	Glo1	0.17	8.2	0	-	-	-	-	-	-	-	-	-	-	-	-
382	0.16	Actin, α skeletal muscle	P68136	Acta1	12.32	31.6	8	1.0792	-	0.9299	-	0.6474	-	0.7438	-	1.1097	-	1.0262	-
383	0.16	REVERSED Protein Frem2	D3ZG74	Frem2	0.17	9.5	0	-	-		-		-		-		-		-
384	0.16	Protein Kdm5a	E9PSW7	Kdm5a	0.16	20.2	0	0.9875	-	0.8418	-	0.7602	-	0.969	-	0.8788	-	0.8527	-
385	0.15	Uncharacterized protein	F1M1R0	-	2.19	28.7	2	0.8114	-	0.9466	-	1.0542	-	0.8139	-	1.0997	-	0.6002	-
386	0.15	Protein Zfp746	F1LSG4	Zfp746	0.15	11.1	0	0.8924	-	0.8406	-	0.8267	-	0.8482	-	0.7766	-	0.8152	-
387	0.15	Protein Ces2c	G3V9D8	Ces2c	0.15	8.4	0	0.9932	-	1.8379	-	1.4603	-	1.4252	-	1.3157	-	1.7519	-
388	0.15	Histone H3	M0R537	LOC686736	0.15	44.1	0	1.1994	-	1.2412	-	5.303	-	6.6382	-	0.8979	-	1.1731	-
389	0.14	Protein Tex15	D3ZYB8	Tex15	0.14	17.3	0	1.2261	-	22.7779	-	2.0771	-	1.9368	-	1.1874	-	2.3241	-
390	0.14	Protein Klk4	F7F4Q8	Klk4	0.14	25.3	1		-		-		-		-		-		-
391	0.13	Protein Gp1ba	D3ZQU7	Gp1ba	0.14	11.6	0	1.1141	-	1.1086	-	0.9556	-	0.9332	-	0.9982	-	1.2187	-
392	0.12	Protein RGD1564184	F1M3Y4	RGD1564184	2.17	24.4	2	1.3445	-	1.9278	-	3.0575	-	0.9104	-	1.0601	-	0.7207	-
393	0.12	REVERSED Contactin-associated protein like 5-2	Q0V8T5	Cntnap5b	0.13	15.5	0	-	-	-	-	-	-	-	-	-	-	-	-
394	0.12	REVERSED Phospholipase D2	P70498	Pld2	0.12	20	0	0.8378	-	0.8812	-	0.8665	-	0.9051	-	0.6718	-	0.8348	-
395	0.12	REVERSED Outer dense fiber protein 1	P21769	Odf1	0.12	20.4	0	-	-	-	-	-	-	-	-	-	-	-	-
396	0.12	Protein disulfide-isomerase A6	Q63081	Pdia6	0.12	11.8	0	1.2277	-	1.725	-	1.7691	-	1.1277	-	1.2802	-	0.9826	-
397	0.11	Protein Slc9c2 (Fragment)	F1M5L2	Slc9c2	0.12	11	0	0.8119	-	1.2432	-	0.8184	-	1.0536	-	0.8083	-	1.0165	-
398	0.11	Dynamin-2	P39052	Dnm2	0.11	13.3	0		-		-		-		-		-		-
399	0.11	REVERSED Protein Trip4	B5DEP5	Trip4	0.11	19.3	0	0.9875	-	0.8418	-	0.7602	-	0.969	-	0.8788	-	0.8527	-
400	0.1	REVERSED Protein Dnah5	M0R8U1	Dnah5	0.1	12.6	0	1.5606	-	2.5194	-	0.5701	-	1.0922	-	1.3573	-	1.8433	-
401	0.1	REVERSED Protein Greb1l	F1LTR0	RGD1566021	0.1	14	0		-		-		-		-		-		-
402	0.1	Protein Lin28b	D3ZIK1	Lin28b	0.1	27.3	1	1.0123	-	0.9865	-	1.0237	-	1.3565	-	1.1911	-	1.2544	-
403	0.09	REVERSED Extracellular sulfatase Sulf-1	F1LNA6	Sulf1	2.01	14.3	1	1.8448	-	0.9612	-	2.1607	-	1.9614	-	0.8826	-	0.1295	-
404	0.09	REVERSED Structural maintenance of chromosomes protein 1A	Q9Z1M9	Smc1a	0.15	19.8	0	-	-	-	-	-	-	-	-	-	-	-	-
405	0.09	Protein Eif4enif1	D4ACF1	Eif4enif1	0.1	17.3	0	-	-	-	-	-	-	-	-	-	-	-	-
406	0.09	REVERSED Protein S100-B	P04631	S100b	0.1	16.3	0	-	-	-	-	-	-	-	-	-	-	-	-
407	0.09	Lysyl oxidase-like 1	Q5FWS5	Loxl1	0.09	18.9	1	-	-	-	-	-	-	-	-	-	-	-	-
408	0.08	Uncharacterized protein	F1LZ85		0.09	21.2	0	1.1556	-	1.0396	-	1.2955	-	1.0224	-	0.8333	-	0.8074	-
409	0.08	REVERSED Protein Soga3	D4A0A1	Soga3	0.08	19.9	1	-	-	-	-	-	-	-	-	-	-	-	-
410	0.08	REVERSED Protein LOC501033	D3ZGF2	LOC501033	0.08	14.1	0	-	-	-	-	-	-	-	-	-	-	-	-
411	0.08	Protein Asap2 (Fragment)	F1M7E9	Asap2	0.08	13.9	0	1.9638	-	1.9772	-	1.3344	-	1.0345	-	1.0624	-	1.2895	-
412	0.08	REVERSED Cytochrome P450 20A1	F1LSK6	Cyp20a1	0.08	17.5	0	1.0905	-	1.0242	-	3.6648	-	3.7515	-	0.6733	-	0.6412	-
413	0.07	Protein Fer1l6	F1LXL6	Fer1l6	0.08	10.7	0	0.9491	0.7514	0.9911	0.9429	3.1487	0.5103	1.0218	0.8635	0.8348	0.4731	0.9943	0.9838
414	0.07	Erythroid spectrin β	Q6XDA0	Sptb	0.07	18.8	1	0.1989	-	0.1311	-	0.3519	-	0.6602	-	0.6951	-	1.5491	-
415	0.07	REVERSED Protein Frem3	D3ZYN7	Frem3	0.07	9.5	1	-	-	-	-	-	-	-	-	-	-	-	-
416	0.07	Phosphatidylinositol 3,4,5-trisphosphate 5-phosphatase 1	F1M981	Inpp5d	0.07	12.3	0	-	-	-	-	-	-	-	-	-	-	-	-
417	0.07	Protein Zfp3	D3ZIG3	Zfp3	0.07	23.5	0	0.8602	-	0.6248	-	1.0124	-	0.7623	-	0.755	-	0.6737	-
418	0.07	Arrestin domain containing 2, isoform CRA_a	D3ZPW1	Arrdc2	0.07	33	0	1.245	-	1.2562	-	0.6442	-	0.6878	-	0.7839	-	0.8363	-
419	0.07	Protein RGD1306058	D3ZPP9	RGD1306058	0.07	16.3	0	0.7686	-	1.378	-	0.6375	-	1.0156	-	0.8768	-	1.1949	-
420	0.06	Protein Utp6	F1M805	Utp6	0.06	22.7	0	0.8409	-	0.8401	-	0.6844	-	0.7467	-	0.7506	-	0.7982	-
421	0.06	REVERSED Glycine receptor subunit β	P20781	Glrb	0.06	9.3	0	-	-	-	-	-	-	-	-	-	-	-	-
422	0.06	Protein Tapt1 (Fragment)	D4A533	Tapt1	0.06	8.1	0	1.0393	-	1.403	-	1.1595	-	1.5306	-	0.9568	-	1.112	-
423	0.06	REVERSED Phospholipase A2, group III (Predicted), isoform CRA_a	D3ZGN6	Pla2g3	0.06	6.5	0	1.5989	-	1.1601	-	1.1769	-	0.9023	-	1.7794	-	1.3541	-
424	0.05	Protein Olr86	D3ZQM4	Olr86	0.08	6.7	0	1.0067	-	1.2381	-	0.8803	-	0.777	-	0.8291	-	0.889	-
425	0.05	Protein Lrp1b	F1M443	Lrp1b	0.06	15.3	0	1.074	0.9091	0.9692	0.8352	1.4061	0.2859	1.2174	0.7908	1.129	0.5985	0.9212	0.6128
426	0.05	REVERSED Protein Shprh	D4A9B2	Shprh	0.05	20.3	0	0.9497	-	1.4694	-	3.1437	-	3.5976	-	0.6881	-	0.8505	-
427	0.05	Protein Armcx4	D3ZV39	Armcx4	0.05	13.7	0	-	-	-	-	-	-	-	-	-	-	-	-
428	0.05	REVERSED DDHD domain containing 1	Q3ZAU5	Ddhd1	0.05	16.3	0	1.3199	-	0.9184	-	1.3719	-	0.9294	-	1.2545	-	1.1136	-
429	0.05	REVERSED Focal adhesion kinase 1	R9PXT6	Ptk2	0.05	12.5	0	-	-	-	-	-	-	-	-	-	-	-	-
430	0.05	REVERSED Ribonucleoside-diphosphate reductase	Q5U2Q5	Rrm1	0.05	18.7	0	1.2058	-	0.9675	-	8.8214	-	8.3758	-	1.1969	-	1.299	-
431	0.05	Protein Uevld (Fragment)	F1M0M3	Uevld	0.05	9.3	0	-	-	-	-	-	-	-	-	-	-	-	-
432	0.05	Proteasome subunit β type	G3V7Q6	Psmb5	0.05	13.7	0	1.032	-	1.5415	-	1.6023	-	1.5338	-	1.0807	-	1.2198	-
